# Supplementary material
Source: publisher figshare collection journal article supplement (https://acs.figshare.com/ndownloader/files/4035046)
Supplement: Supplementary file 1 [file 4035046]

## Supporting Information

### A Potent Anti-CD70 Antibody-Drug Conjugate Combining a Dimeric Pyrrolobenzodiazepine Drug with Site-Specific Conjugation Technology

**Author List:** Scott C. Jeffrey,<sup>\*</sup> Patrick J. Burke,<sup>†</sup> Robert P. Lyon,<sup>†</sup> David W. Meyer,<sup>†</sup> Django Sussman,<sup>†</sup> Martha Anderson,<sup>†</sup> Chris I. Lieske,<sup>†</sup> Joshua H. Hunter,<sup>†</sup> Jamie B. Miyamoto,<sup>†</sup> Nicole D. Nicholas,<sup>†</sup> Nicole M. Okeley,<sup>†</sup> Russell J. Sanderson,<sup>†</sup> Ivan Stone,<sup>†</sup> Weiping Zeng,<sup>†</sup> Stephen J. Gregson,<sup>‡</sup> Luke Masterson,<sup>‡</sup> Arnaud C. Tiberghien,<sup>‡</sup> Philip W. Howard,<sup>‡</sup> David E. Thurston,<sup>§</sup> Che-Leung Law,<sup>†</sup> Peter D. Senter<sup>†</sup>

<sup>†</sup>Department of Research & Translational Medicine, Seattle Genetics, Inc., Bothell, WA 98021.

<sup>‡</sup>Spirogen Ltd., QMB Innovation Centre, 42 New Road, London E1 2AX, United Kingdom.

<sup>§</sup>Department of Pharmacy, Institute of Pharmaceutical Sciences, King's College London, Franklin-Wilkins Building, 150 Stamford Street, London SE1 9NH.

#### Index:

**Figure S1.** Analytic Assessment of Hinge Cysteine Conjugates

**Figure S2.** Ex vivo rat plasma stability of h1gG<sub>239C</sub>-PBD.

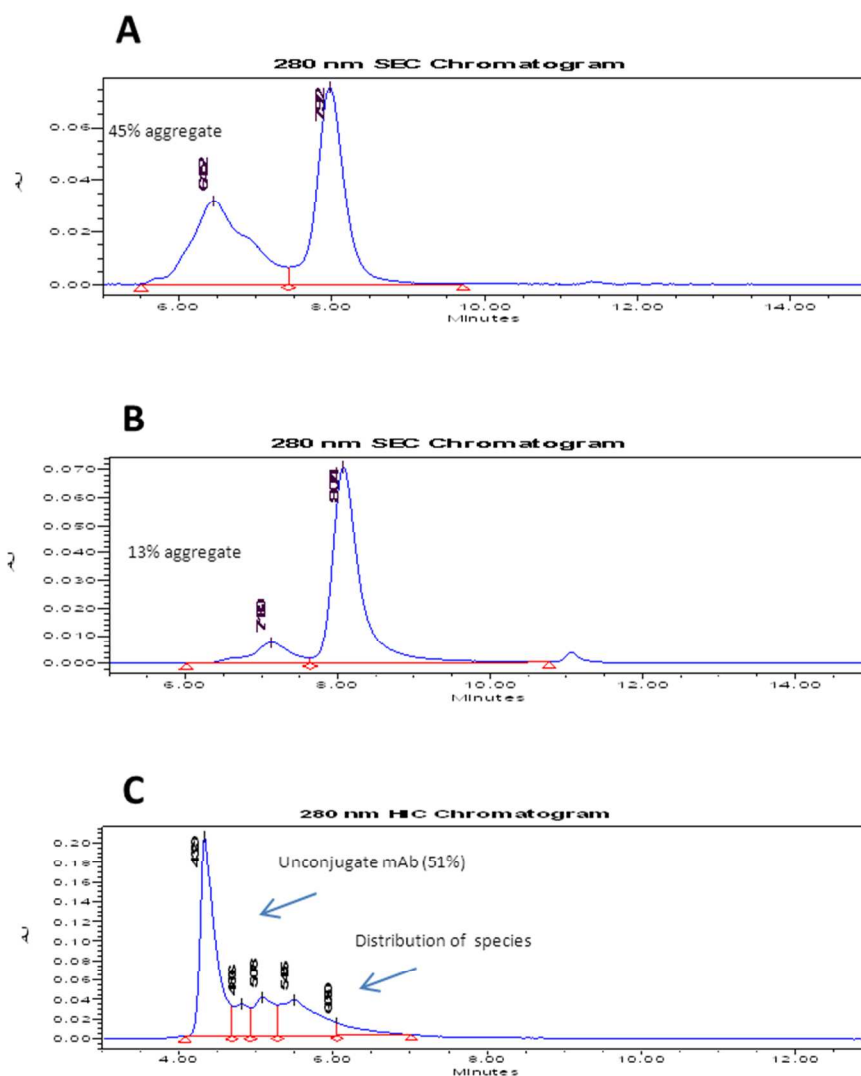

**Figure S1.** Analytic assessment of hinge cysteine conjugates. A, Size exclusion chromatography of h1F6-PBD(4) and (B) h1F6-PBD(2). C, Hydrophobic interaction chromatography of h1F6-PBD(2) showed 51% of ADC mixture was unconjugated h1F6.

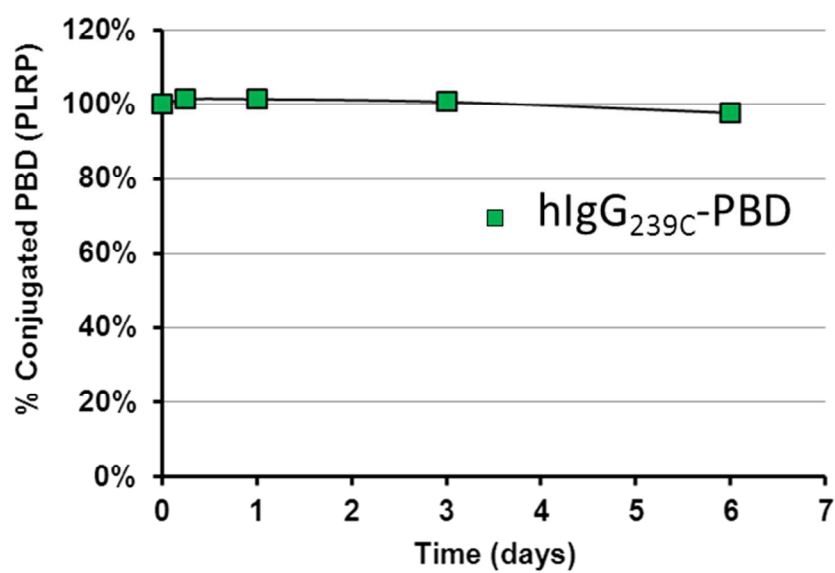

**Figure S2.** Ex vivo rat plasma stability of hIgG<sub>239C</sub>-PBD. Resin-captured ADC from rat plasma was assessed for heavy chain drug-loading by PLRP and showed no significant loss of drug over 6 days.
